# Supplementary material
Source: MDPI journal article supplement (https://www.mdpi.com/2076-3417/7/7/736)
Supplement: s1 [file s1]

# Supplementary Materials: Synthesis, Characterization, and Antibacterial Activities of High-Valence Silver Propamidine Nanoparticles

Jinran Lee<sup>†</sup>, Baskaran Purushothaman<sup>†</sup>, Zhao Li, Goutam Kulsi and Joon Myong Song

<sup>†</sup>These two authors contributed equally to this work.

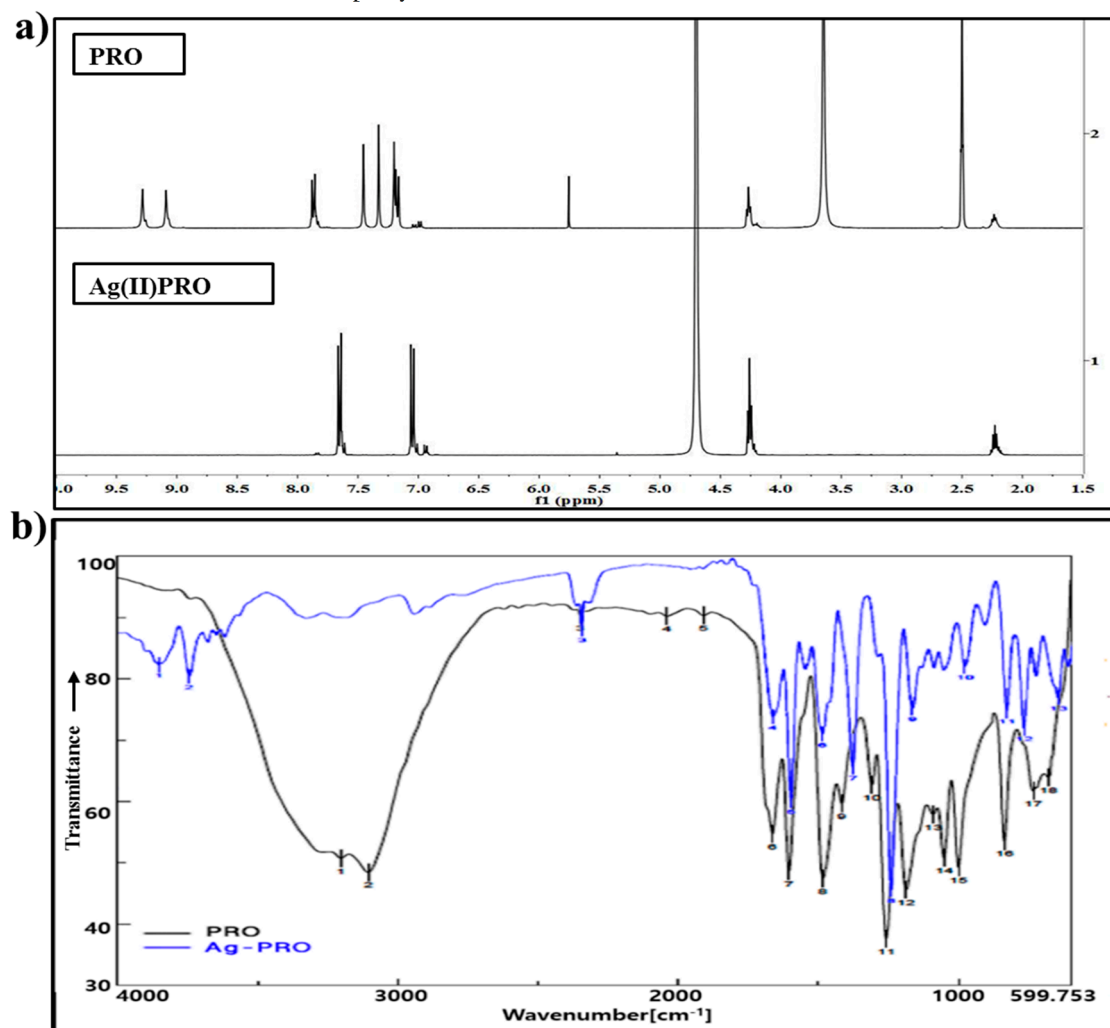

**Figure S1.** <sup>1</sup>H NMR and FT-IR spectra of the propamidine (a) and newly synthesized silver(II) propamidine complex (b).

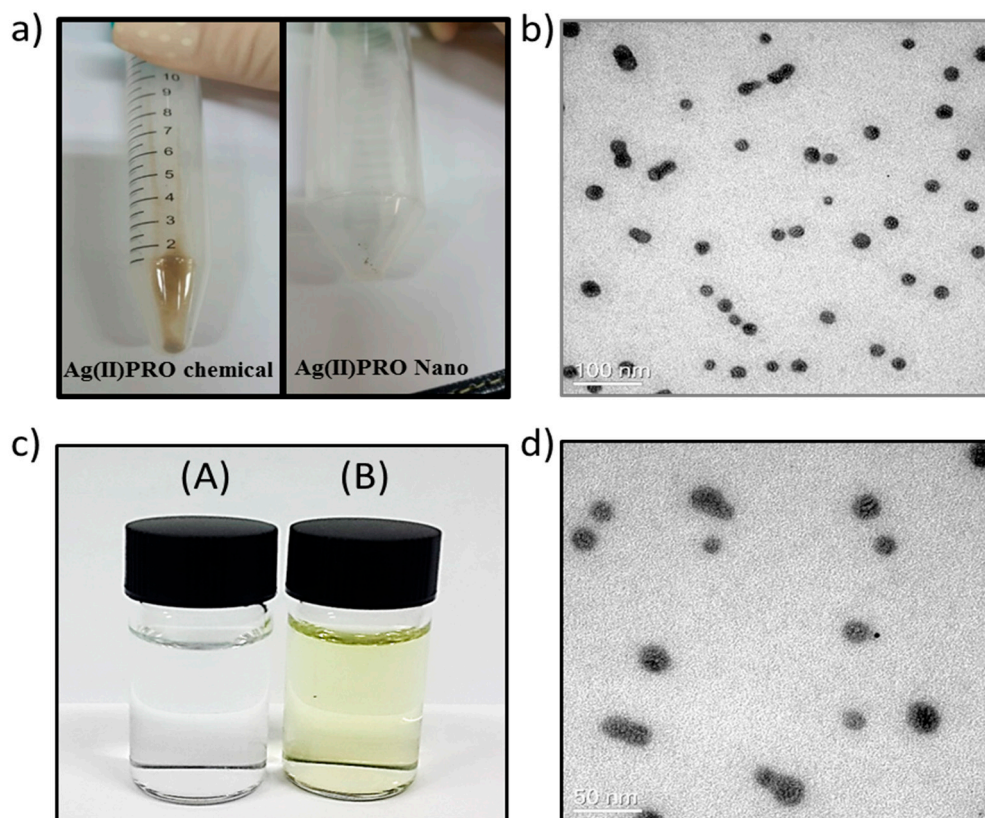

**Figure S2.** Visual observation of freshly synthesized Ag(II)PRO nanoparticles (a) and AgNPs (c) TEM image of Ag(II)PRO nanoparticles (b) and AgNPs (d).

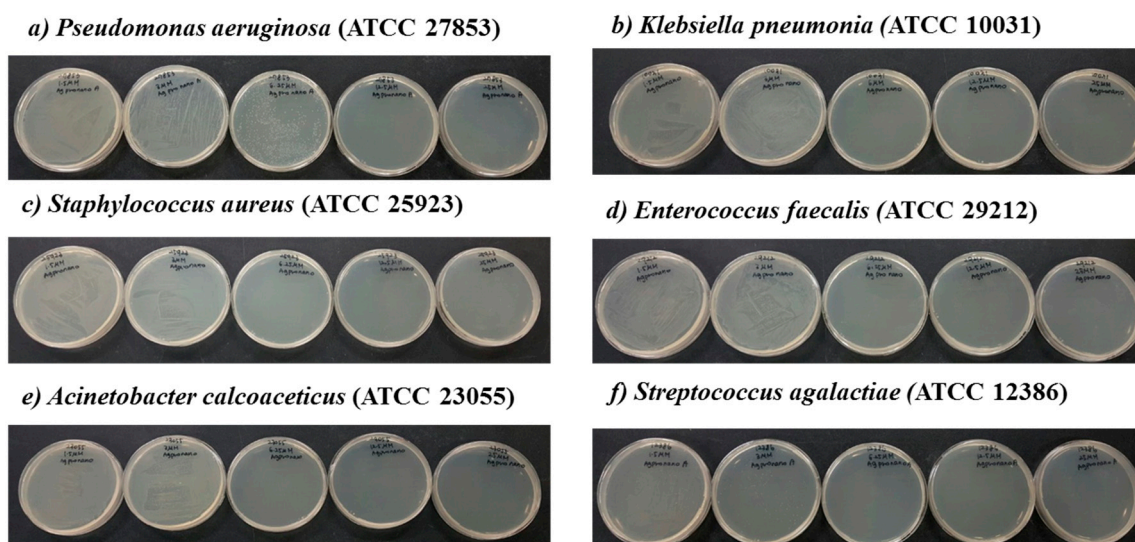

**Figure S3.** Petri dishes initially supplemented with  $10^7$  CFU/mL of Gram-positive /negative strains (a, b, c, d, e, f) and incubated with different concentrations of silver(II) propamidine nanoparticles, from left to right 1.5, 3, 6.25, 12.5, and 25  $\mu$ M.

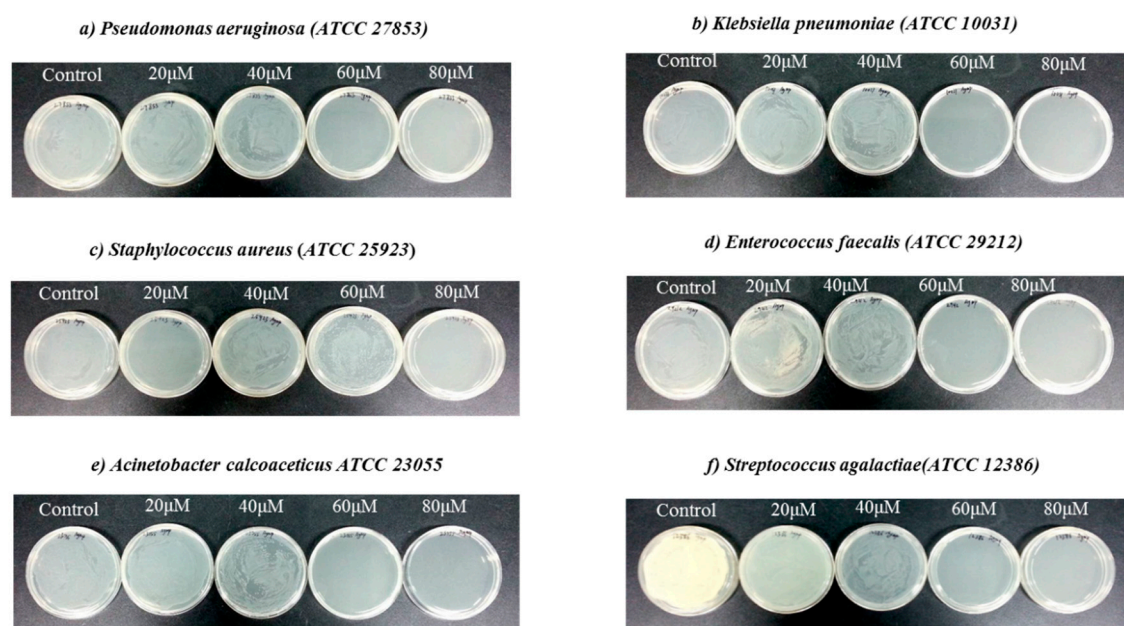

**Figure S4.** Petri dishes initially supplemented with  $10^7$  CFU/ml of Gram-positive /negative strains (**a**, **b**, **c**, **d**, **e**, **f**) and incubated with different concentrations of silver nanoparticles, from left to right control, 20, 40, 60, and 80  $\mu$ M.
